# Supplementary material
Source: PubMed Central journal article supplement (PMC5047099)
Supplement: supp_pp.16.00860_PP2016-00860DR1_Supplemental_Data.pdf [file supp_pp.16.00860_PP2016-00860DR1_Supplemental_Data.pdf]

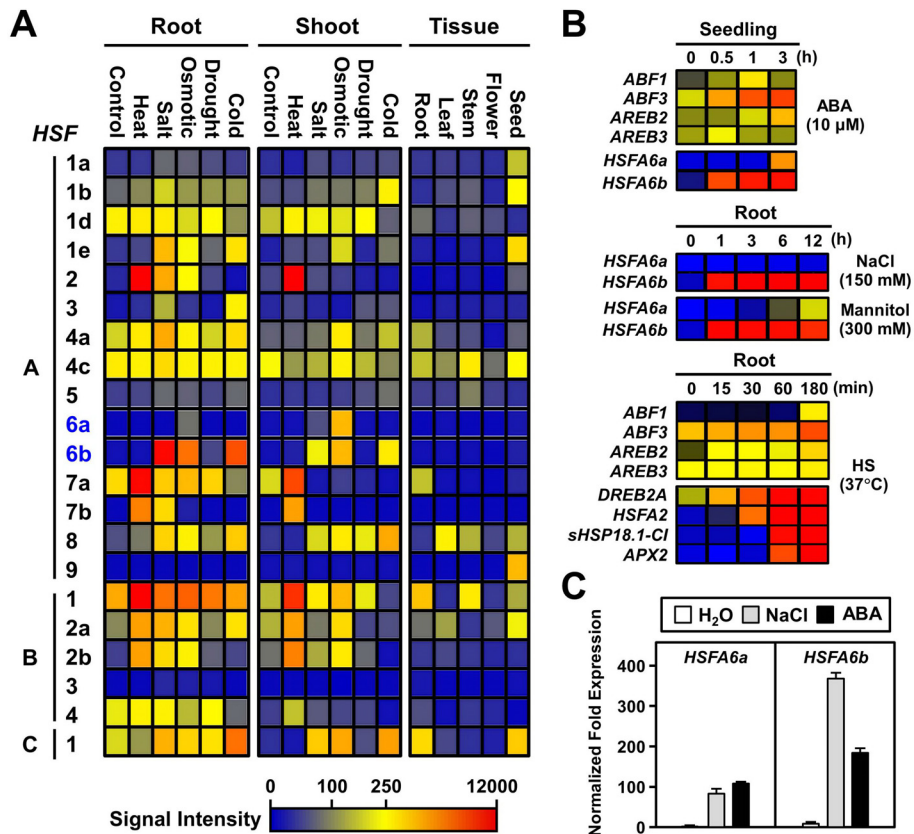

**Supplemental Figure S1. The expression profiles of Arabidopsis 21 heat shock factor (HSF) genes under abiotic stresses and during development. (A and B)** Normalized and averaged signals were analyzed as “heat maps” with GeneSpring 7.3 (Silicon Genetics). The color code of signal intensities corresponds to the abundance of transcripts, from low (blue) to high (red) expression. Root samples: 1-h heat stress (38°C in incubator); 6-h salt (150 mM NaCl), drought (15 min dry air stream until 10% loss of fresh weight) or osmotic (300 mM mannitol) stress; 12-h cold (4°C). Shoot samples: 1-h heat stress, 12-h salt, drought, cold or osmotic stress. Developmental samples: roots and leaves of 15-d-old plants; second stem internode, 21 days; flowers at stage 12; mature seeds at stage 10. The detailed microarray data was provided by the AtGenExpress consortium (<http://www.arabidopsis.org/info/expression/ATGenExpress.jsp>). The expression profiles of *HSFA6a*, *HSFA6b*, and *AREB/ABF* transcripts by time-series abiotic stresses and ABA treatment, as indicated. Note that the *AREB1* probe was not available in the ATH1 GeneChip. **(C)** Nine-d-old seedlings were incubated in H<sub>2</sub>O containing 200 mM NaCl for 6 h or 10 μM ABA for 3 h. The transcription levels of *HSFA6a* and *HSFA6b* were analyzed by qRT-PCR. The fold expression was normalized relative to the *HSFA6a* level in H<sub>2</sub>O treatment. Data are means ± SD of 3 biological replicates. *PP2A* was an internal control.

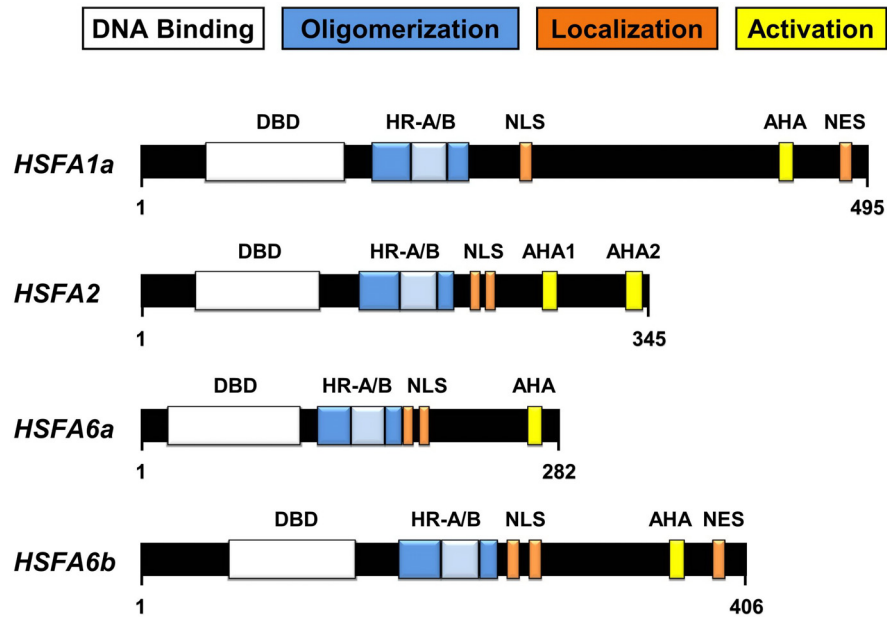

**Supplemental Figure S2. Modular structures of Arabidopsis HSFs HSFA6a and HSFA6b.** The well-studied class-A heat shock factors HSFA1a and HSFA2 were used as references for the conserved HSF signatures comparison. The block diagrams represent their conserved functional domains. N-terminal DNA-binding domain (DBD, white) is a helix-turn-helix motif, which binds to the HSEs of HS-responsive genes. HR-A/B (blue), a heptad-repeat region of hydrophobic amino acid residues, is required for homo- or hetero-oligomerization of HSFs. Nuclear-cytoplasmic shuttling sequence (brown), is a nuclear localization signal (NLS) and nuclear export signal (NES). AHA motifs (yellow), are a short domain enriched in aromatic and large hydrophobic amino acid residues embedded in an acidic surrounding, transcriptional activity of class-A HSFs. Adapted from Nover et al. (2001). HSFA6b harbors NLS and NES, but HSFA6a only contains NLS.

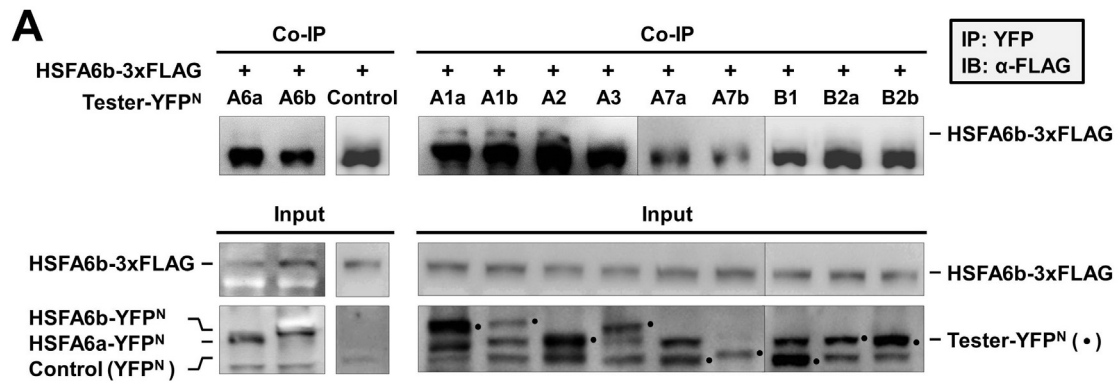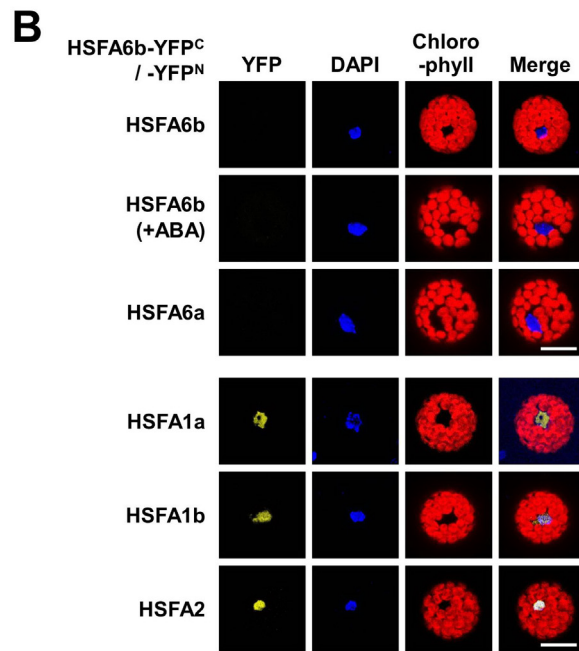

**Supplemental Figure S3. Interaction of HSFA6b and different HSFs. (A)** Co-immunoprecipitation (Co-IP) assay of HSFA6b-3XFLAG and tester (HSFs)-YFP<sup>N</sup> in Arabidopsis leaf mesophyll protoplasts, as indicated. Immunoprecipitation (IP) with anti-GFP antibody and the interacted HSFA6b-3XFLAG were analyzed by immunoblotting (IB) with anti-FLAG antibody. Input protein (50%) was used as control of immunoblotting in the transfected cell lysates. **(B)** Confocal micrographs of protoplasts showing the interaction of HSFA6b-YFP<sup>C</sup> and HSFs-YFP<sup>N</sup> by using BiFC analysis without or with 10-μM ABA for 2 h treatment (+ABA), as indicated in **Figure 2**.

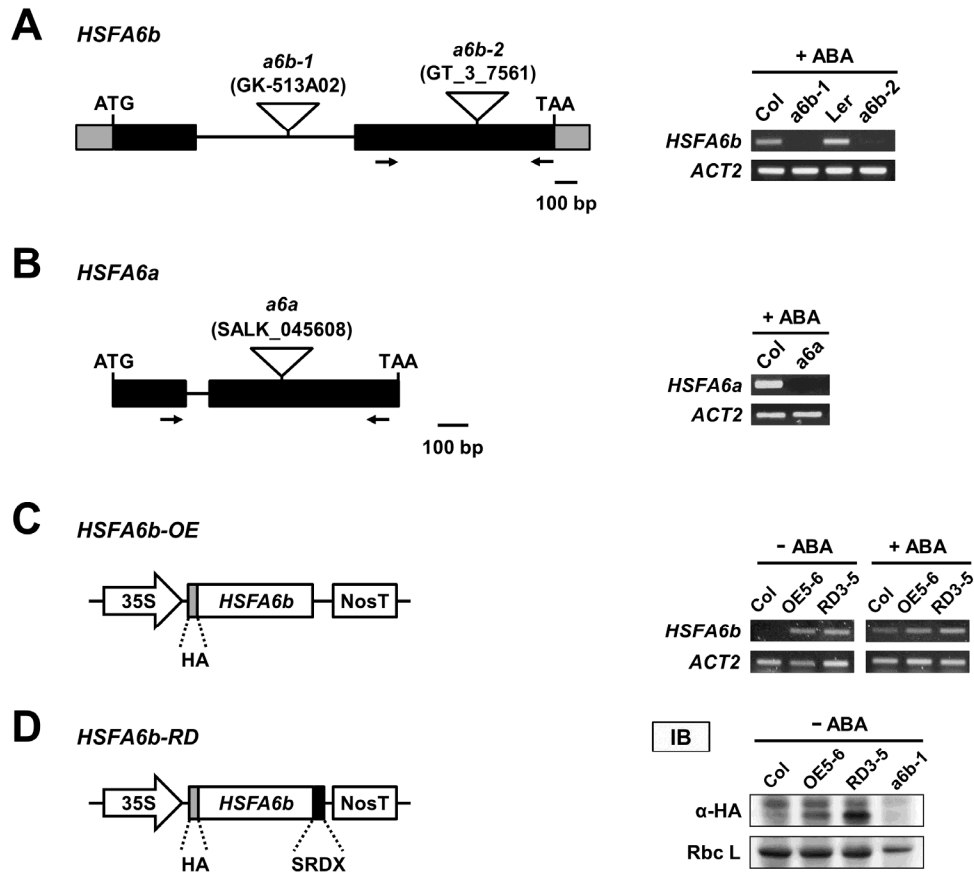

**Supplemental Figure S4. Characterization of *HSFA6b* and *HSFA6b* T-DNA insertion, overexpression, and dominant-negative mutant lines. (A and B)** Schematic maps of *HSFA6b* and *HSFA6a* gene structure and T-DNA insertion sites. Exon, UTR, and T-DNA are indicated by black, gray, and triangle, respectively. The specific primers for genotyping and RT-PCR are shown with black arrows. ATG and TAA are initiation and stop codons. **(C)** *HSFA6b*-overexpression line *HSFA6b-OE*. *HSFA6b* was fused with the hemagglutinin tag (HA; YPYDVPDYA) to the 5' end and driven by the CaMV 35S promoter. **(D)** *HSFA6b*-dominant-negative line *HSFA6b-RD*. The EAR-motif repression domain SRDX (GLDLLELRGFA) was fused to the 3' end of the HA-*HSFA6b*. The expression level of *HSFA6a* and *HSFA6b* in wild-type, Col and Ler, plants and *HSFA6b* mutants *OE5-6* and *RD3-5* were analyzed by RT-PCR and immunoblotting (IB; with anti-HA antibody and the Rubisco large subunit, Rbc L, shown for equal loading). Plants without (-ABA) or with 3-h 20- $\mu$ M ABA treatment (+ABA) are indicated. *ACT2* was a loading control for RT-PCR.

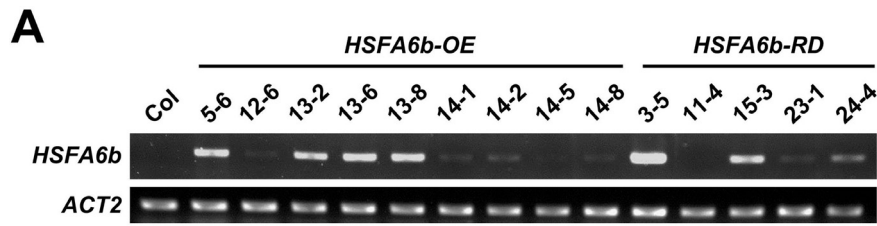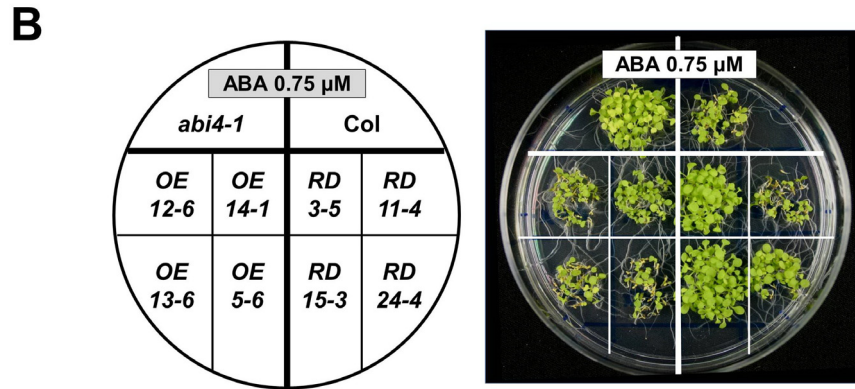

**Supplemental Figure S5. The expression levels of *HSFA6b* and ABA sensitivity in *HSFA6b* mutant lines. (A)** The *HSFA6b* transcription levels were analyzed by RT-PCR, under normal growth condition without ABA treatment, in *HSFA6b-OE* and *HSFA6b-RD* mutant lines. *ACT2* was a loading control. **(B)** Seeds with different expression levels of *HSFA6b*, as indicated in **panel A**, were planted in medium containing 0.75  $\mu$ M ABA, and then photographed at day 12. *abi4-1*, an ABA insensitive mutant (Col ecotype), was used as reference.

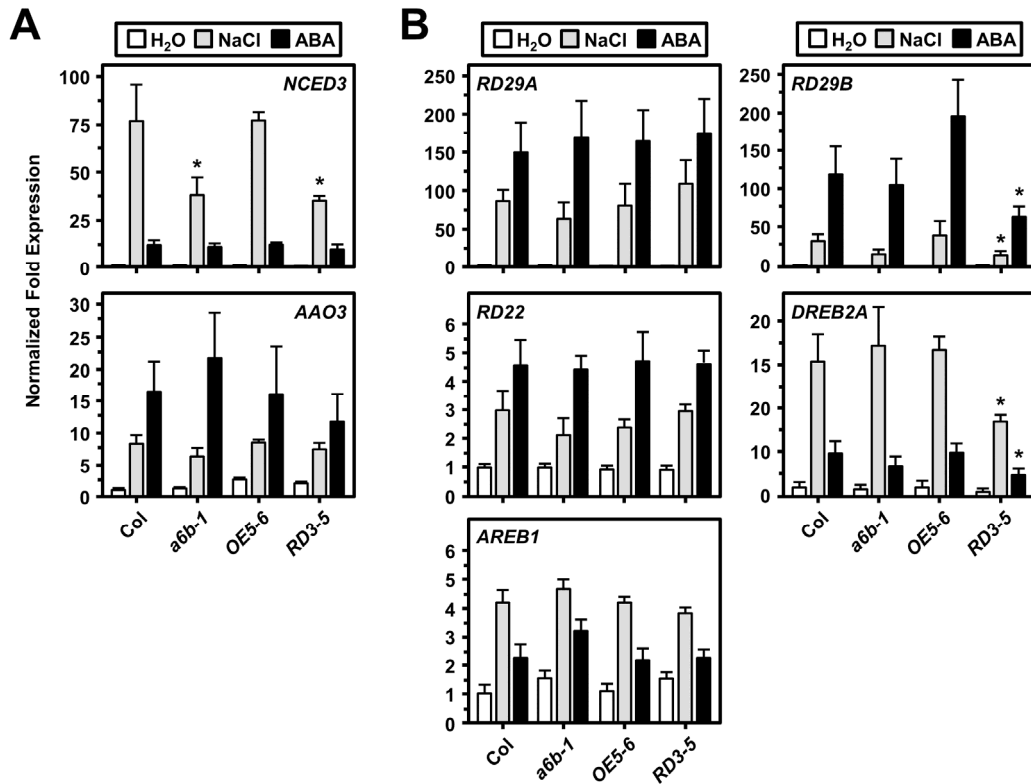

**Supplemental Figure S6. The expression levels of ABA biosynthesis and responsive genes in response to salt and ABA treatments in *HSFA6b* mutants. (A and B)** Nine-d-old seedlings were incubated in H<sub>2</sub>O containing 200 mM NaCl for 6 h or 20 μM ABA for 3 h. The transcription levels of ABA biosynthesis genes *NCED3* and *AAO3*, ABA-responsive genes *RD29A*, *RD29B*, and *RD22*, as well as *DREB2A* and *AREB1*, were analyzed by qRT-PCR. The fold expression was normalized relative to that of Col H<sub>2</sub>O treatment. Data are means ± SD of 3 biological replicates. \*, Significant at  $P < 0.05$  compared with Col. *PP2A* was an internal control.

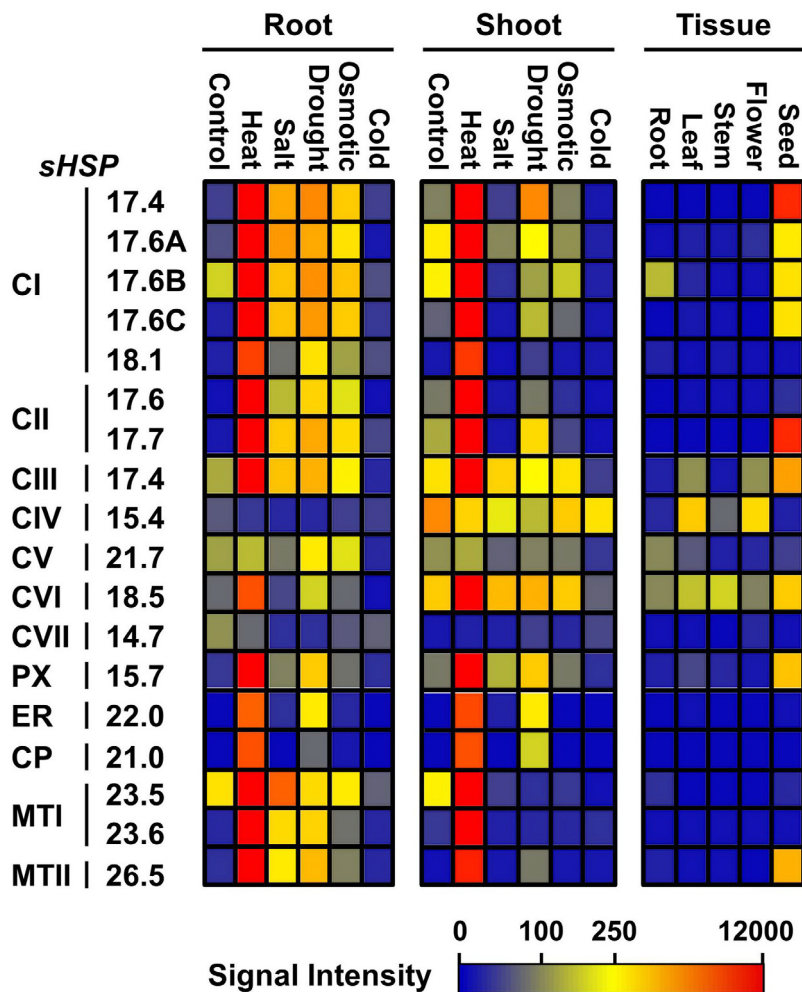

**Supplemental Figure S7. The expression profiles of Arabidopsis 18 small heat shock protein (sHSP) genes under various abiotic stresses and during development.** Normalized and averaged signals are presented as “heat maps”, as indicated in **Supplemental Figure S1**. Because of the absence of a specific probe for *HSP17.8-CI*, only 18 sHSP genes are presented. The *HSP18.5-CIV*, *15.4-CV*, and *21.7-CVI* genes reported by Siddique et al. (2008) were revised as *HSP15.4-CIV*, *21.7-CV*, and *18.5-CVI*, respectively (Waters et al., 2008). CI to CVII (class I to VII subfamily), cytoplasmic/nuclear localization; CP, plastids; ER, endoplasmic reticulum; MT, mitochondria; PX, peroxisomes.

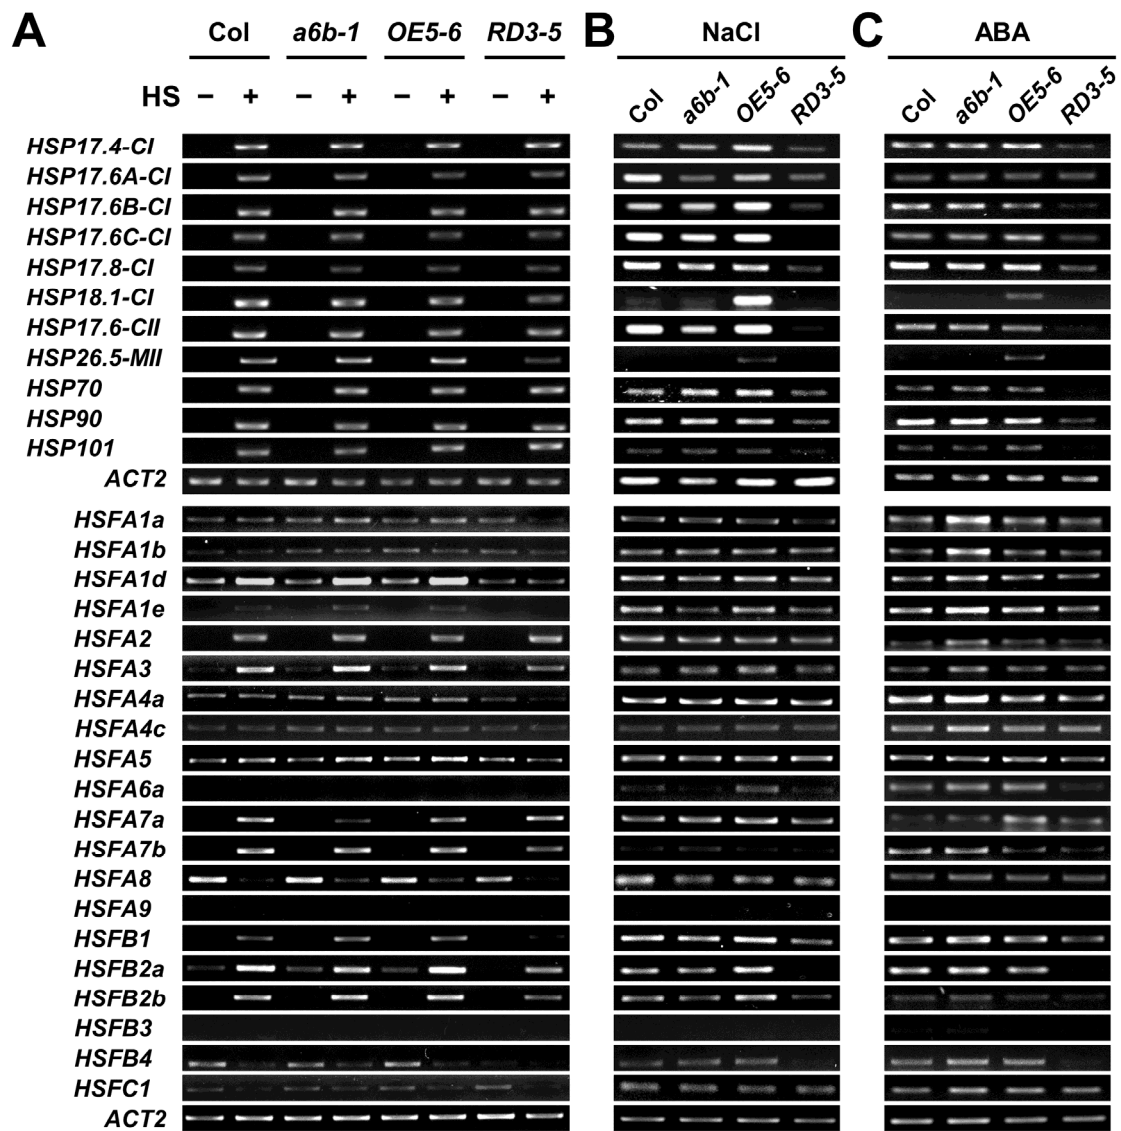

**Supplemental Figure S8. The expression of HS-related genes in response to HS, salt, and ABA treatments in *HSFA6b* mutants. (A to C)** Nine-d-old seedlings were treated without or with HS at 37°C for 1-h, incubated in H<sub>2</sub>O containing 150-mM NaCl for 6 h, and incubated in H<sub>2</sub>O containing 20-μM ABA for 3 h, respectively. The transcription levels of 11 *HSPs* and 20 *HSFs* were analyzed by RT-PCR. *ACT2* was a loading control.



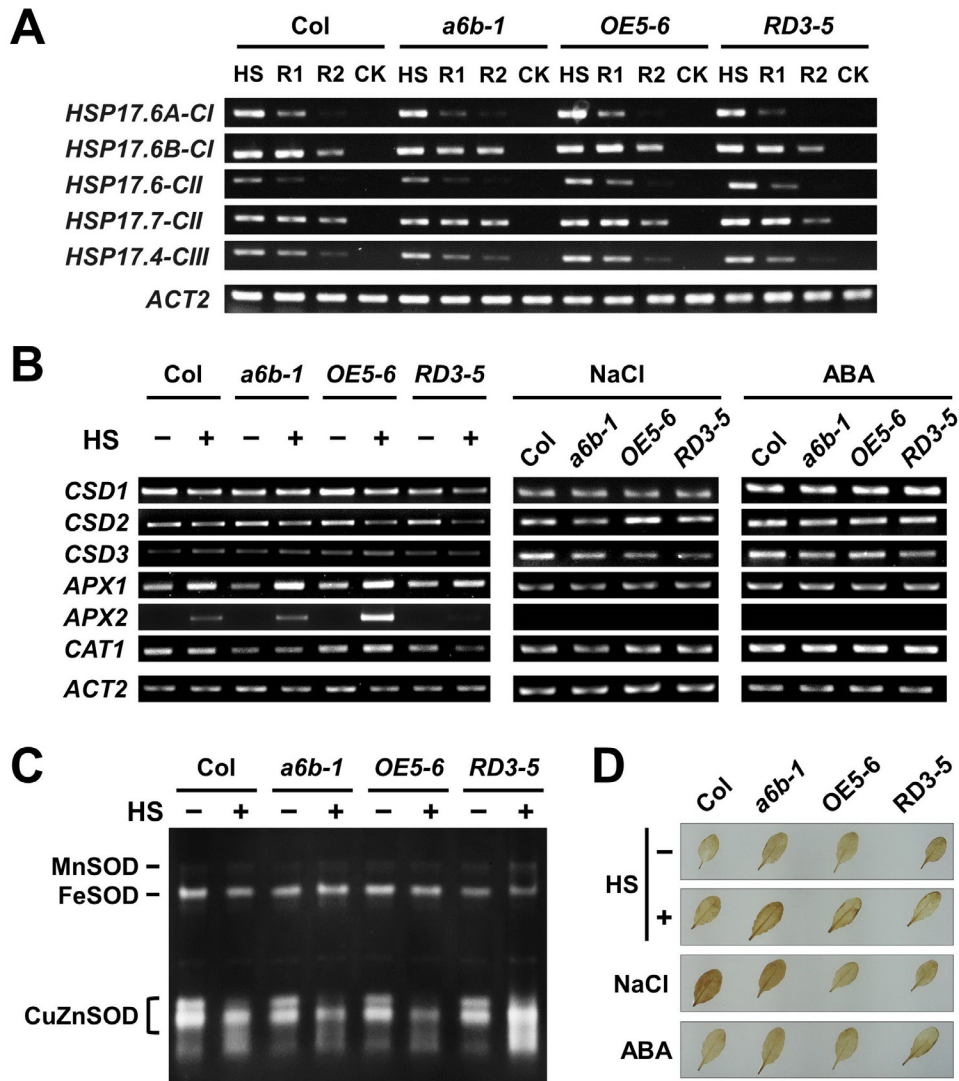

Supplemental Figure S9. The expression levels of HS and oxidative related genes, superoxide dismutase (SOD) activity, and H<sub>2</sub>O<sub>2</sub> detection in response to HS, NaCl, and ABA treatments in *HSFA6b* mutants. Nine-d-old seedlings were treated without or with 1-h 37°C HS and then underwent recovery for 1 or 2 h (R1 and R2). The NaCl and ABA treatments, as indicated in Supplemental Figure S8. (A and B) The transcription levels of 5 HS-related and 6 oxidative-related genes were analyzed by RT-PCR, respectively. (C) In-gel CuZnSOD, FeSOD, and MnSOD activity assay. (D) H<sub>2</sub>O<sub>2</sub> detection by DAB staining.

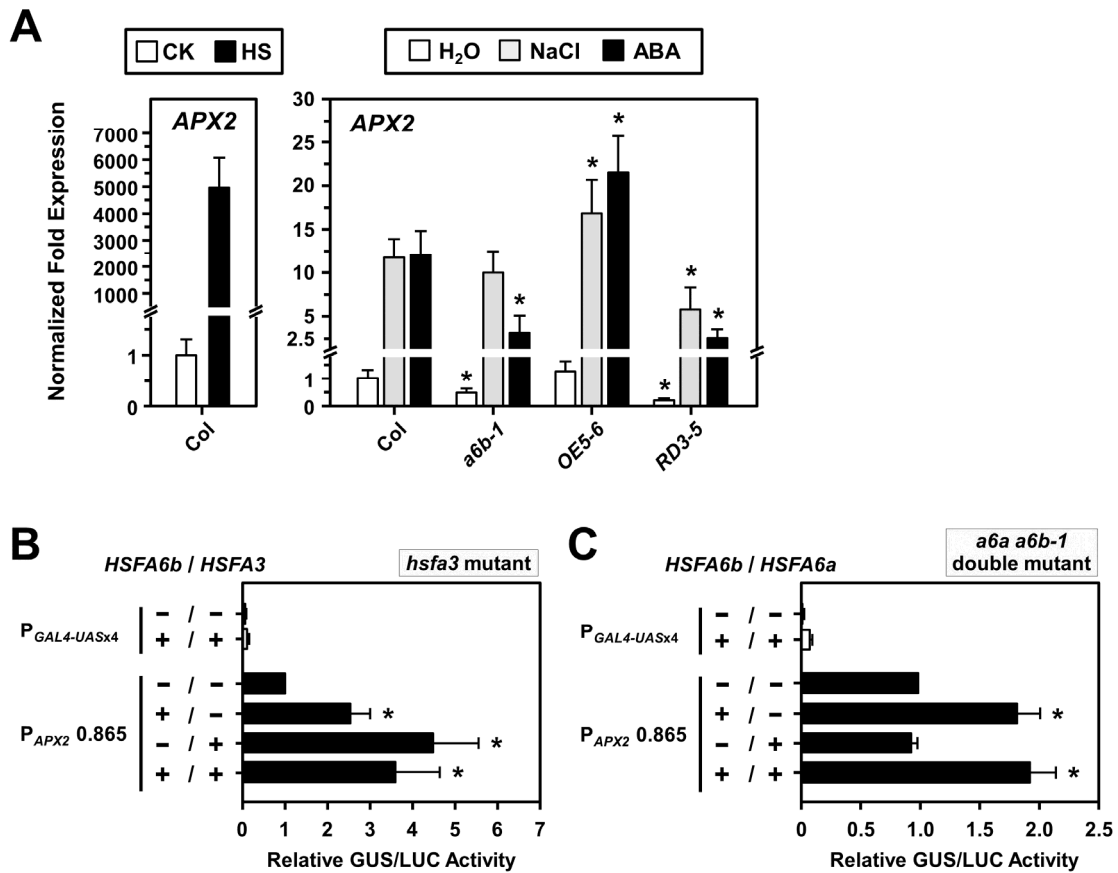

**Supplemental Figure S10. The expression levels of *APX2* in response to HS, NaCl, and ABA treatment in *HSFA6b* mutants, as well as *HSFA6b* mediated *HSFA3* activation of the *APX2* promoter. (A)** Nine-d-old seedlings were treated without (control) or with 1-h 37°C HS. The NaCl and ABA treatments are as indicated in **Supplemental Figure S8**. The transcription levels of *APX2* were analyzed by qRT-PCR. The fold expression was normalized to that of wild-type (Col) plants with mock (control or H<sub>2</sub>O) treatment. Data are means  $\pm$  SD of 3 independent replicates. \*, Significant at  $P < 0.05$  compared with the Col. *PP2A* was an internal control. **(B and C)** *hsfa3* and *hsfa6a hsfa6b* double (*a6a a6b-1*) mutant protoplasts were used for the transcriptional activation assay.  $P_{GAL4-UASx4}$ , was a control, and 0.856-kb length of the *APX2* promoter was fused with a *GUS* reporter gene, then transfected with or without effectors *HSFA6b*, *HSFA3*, and *HSFA6a*, as indicated. The fold expression was normalized to that with the transfection of  $P_{APX2}$  without effectors, as described in **Figure 4**. Data are means  $\pm$  SD of 3 independent replicates. \*  $P < 0.05$ .

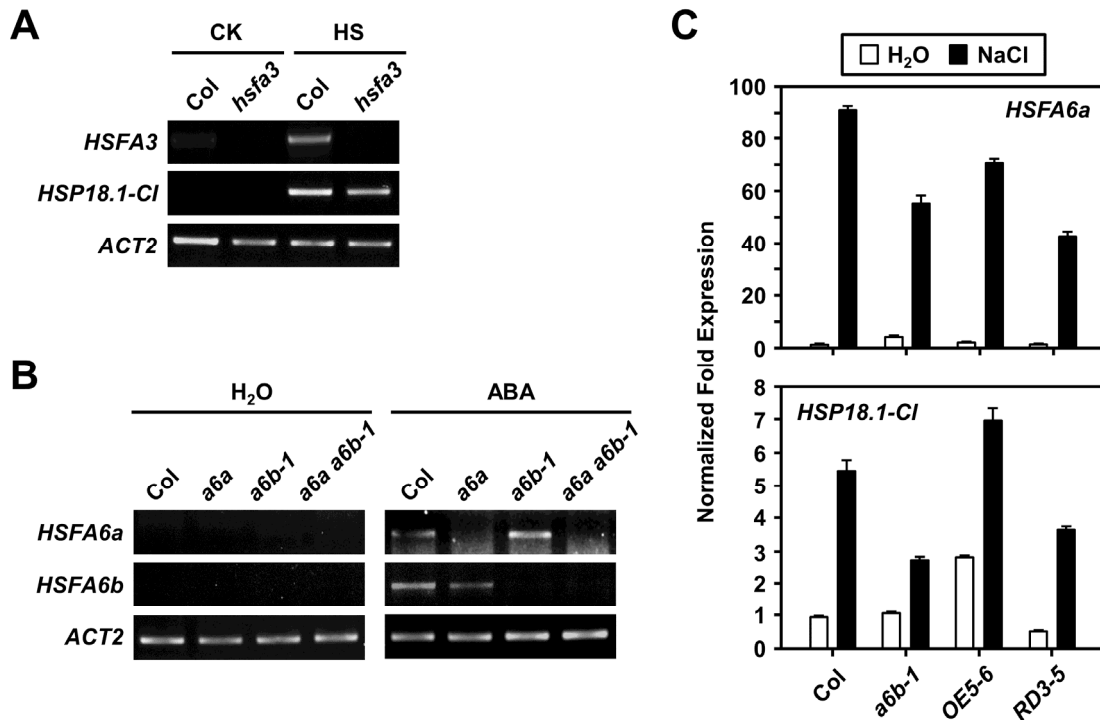

**Supplemental Figure S11. Characterization of *hsf3* and *hsf6a hsf6b* double mutant lines, as well as the *HSFA6a* and *HSP18.1-CI* transcription levels in response to NaCl treatment in *HSFA6b* mutants.** The HS or ABA treatment was as indicated in **Supplemental Figure S8**. **(A and B)** The expression levels of *HSFA3*, *HSFA6a*, and *HSFA6b* in *hsf3* (SALK\_01117) and *a6a a6b-1* double mutant lines were analyzed by RT-PCR. *HSP18.1-CI*, used as a reference, is a HS-responsive gene. *ACT2* was a loading control. **(C)** The *HSFA6a* and *HSP18.1-CI* transcription levels in response to 200-mM NaCl for 6 h in *HSFA6b* mutants were analyzed by qRT-PCR. The fold expression was normalized to that of the *HSFA6a* level in Col H<sub>2</sub>O treatment. Data are means  $\pm$  SD of 3 biological replicates. *PP2A* was an internal control.

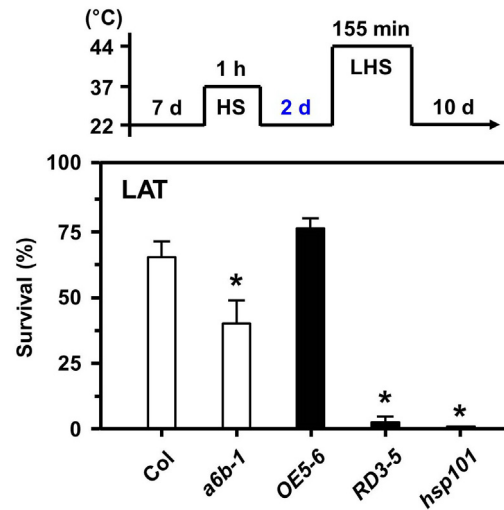

**Supplemental Figure S12. Thermotolerance test in *HSFA6b* mutants.** Seven-d-old seedlings were analyzed for long-term acquired thermotolerance (LAT). The pictogram shows the HS regime. Survival (%) was measured at day 10 after HS treatment, as described in **Figure 8**. Data are means  $\pm$  SD of 3 independent replicates. \*, Significant at  $P < 0.05$  compared with the Col.

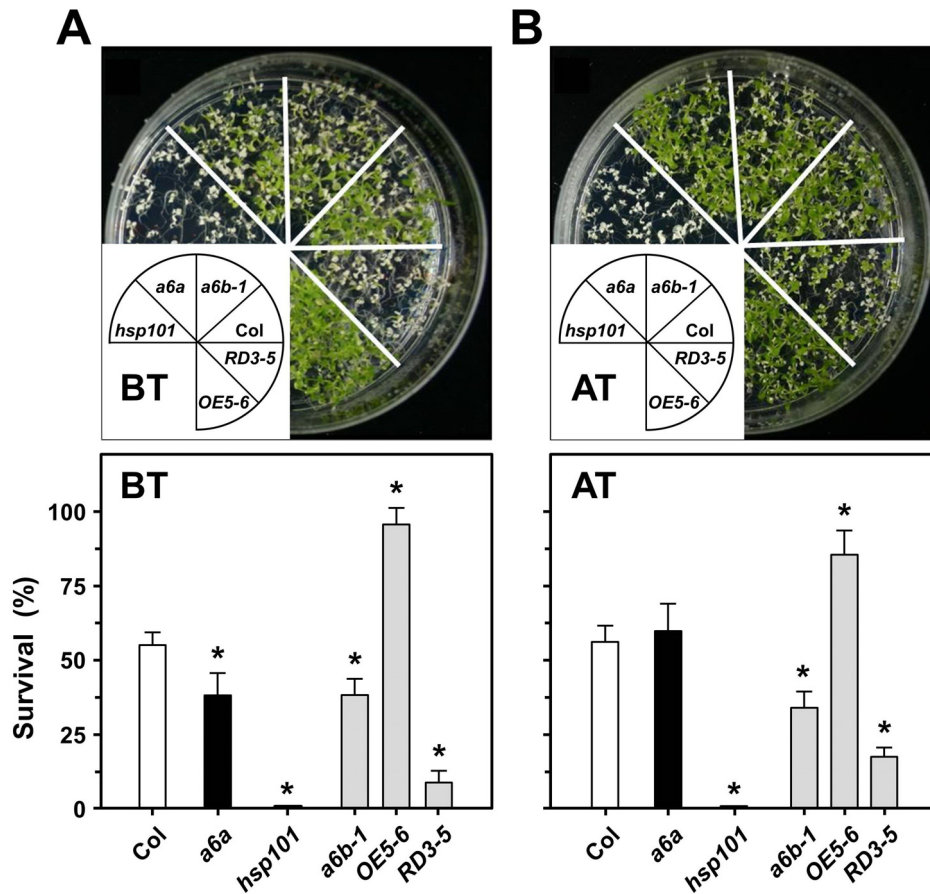

**Supplemental Figure S13. Thermotolerance test in *HSFA6a* and *HSFA6b* mutants. (A and B)** Nine-d-old seedlings were analyzed for BT and AT, respectively, as described in **Figure 8**. Seedlings were photographed (**top**) and survival (%) was measured (**bottom**). Data are means  $\pm$  SD of 3 independent replicates. \*, Significant  $P < 0.05$  compared with the Col.

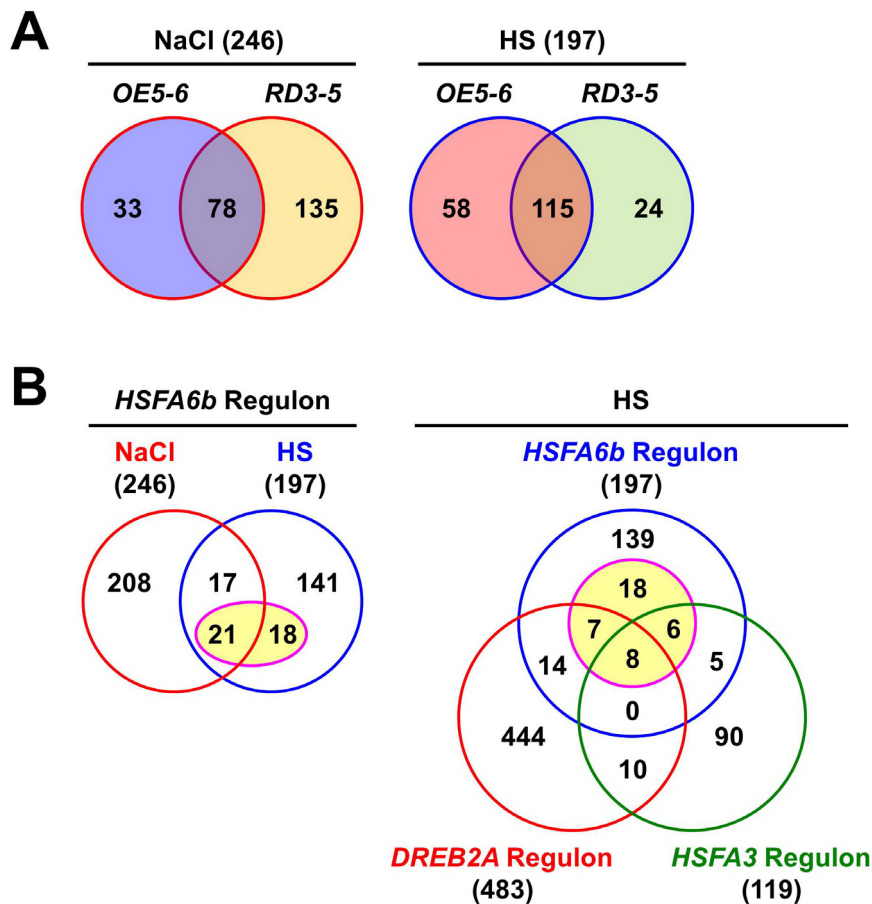

**Supplemental Figure S14. Venn diagram of gene transcripts in response to salt or HS treatment in *HSFA6b* mutants.** Venn diagram based on TAIR locus identifier. **(A)** The expression changed > 6-fold at  $p < 0.10$ , in *HSFA6b* mutants *OE5-6* and *RD3-5* with 150 mM NaCl for 6 h or 37°C HS for 1 h treatment, as compared with Col plants at 22°C-control treatment. **(B)** The top 39 DEGs with expression changed > 30-fold at  $p < 0.05$  of the *HSFA6b* HS response regulon (highlighted in yellow) overlapping with NaCl-response regulon (**left**), and the HS-response regulon of *DREB2A* and *HSFA3* (**right**) (Sakuma et al., 2006; Yoshida et al., 2008). At4g36990 and At4g36988 shared the same probeset number, 246214\_at, in ATH1 GeneChip array.

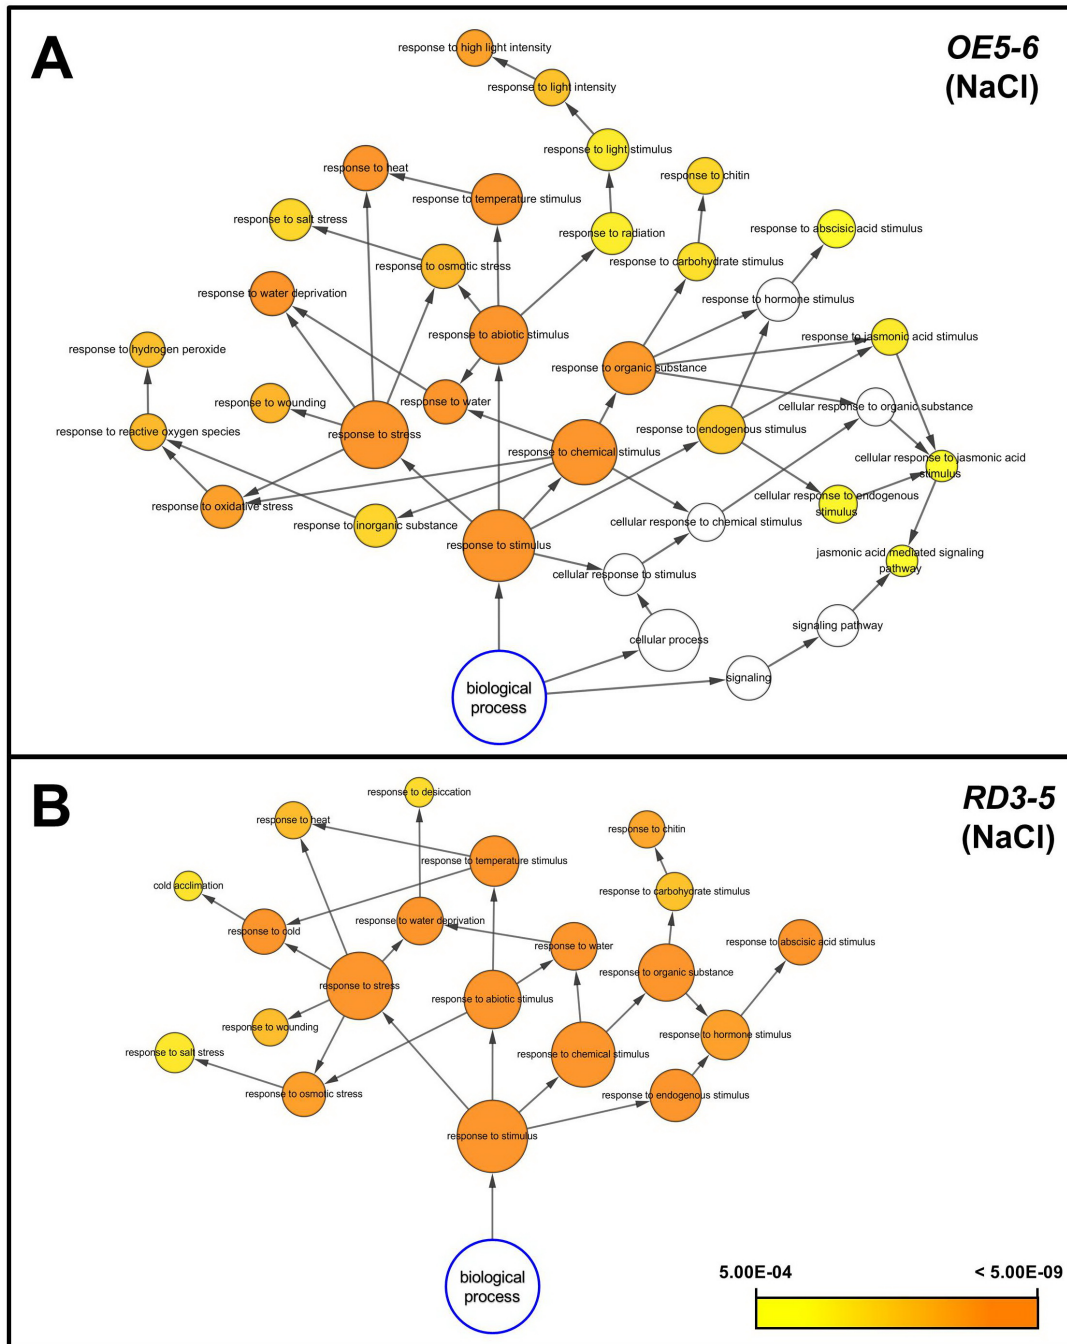

**Supplemental Figure S15. GO enrichment analysis of gene transcripts in response to salt treatment in *HSFA6b* mutants. (A and B) Network graphs of enriched GO terms in response to 150 mM NaCl for 6 h in *OE5-6* and *RD3-5* mutants, respectively, as indicated in Supplemental Figure S14A. The yellow to orange color of the circles correspond to the level of significance of the overrepresented GO category at  $p \leq 5.00E-04$  according to a multiple  $t$  test with false discovery rate-corrected  $p$  value. The size of the circle is proportional to the number of genes in the category.**

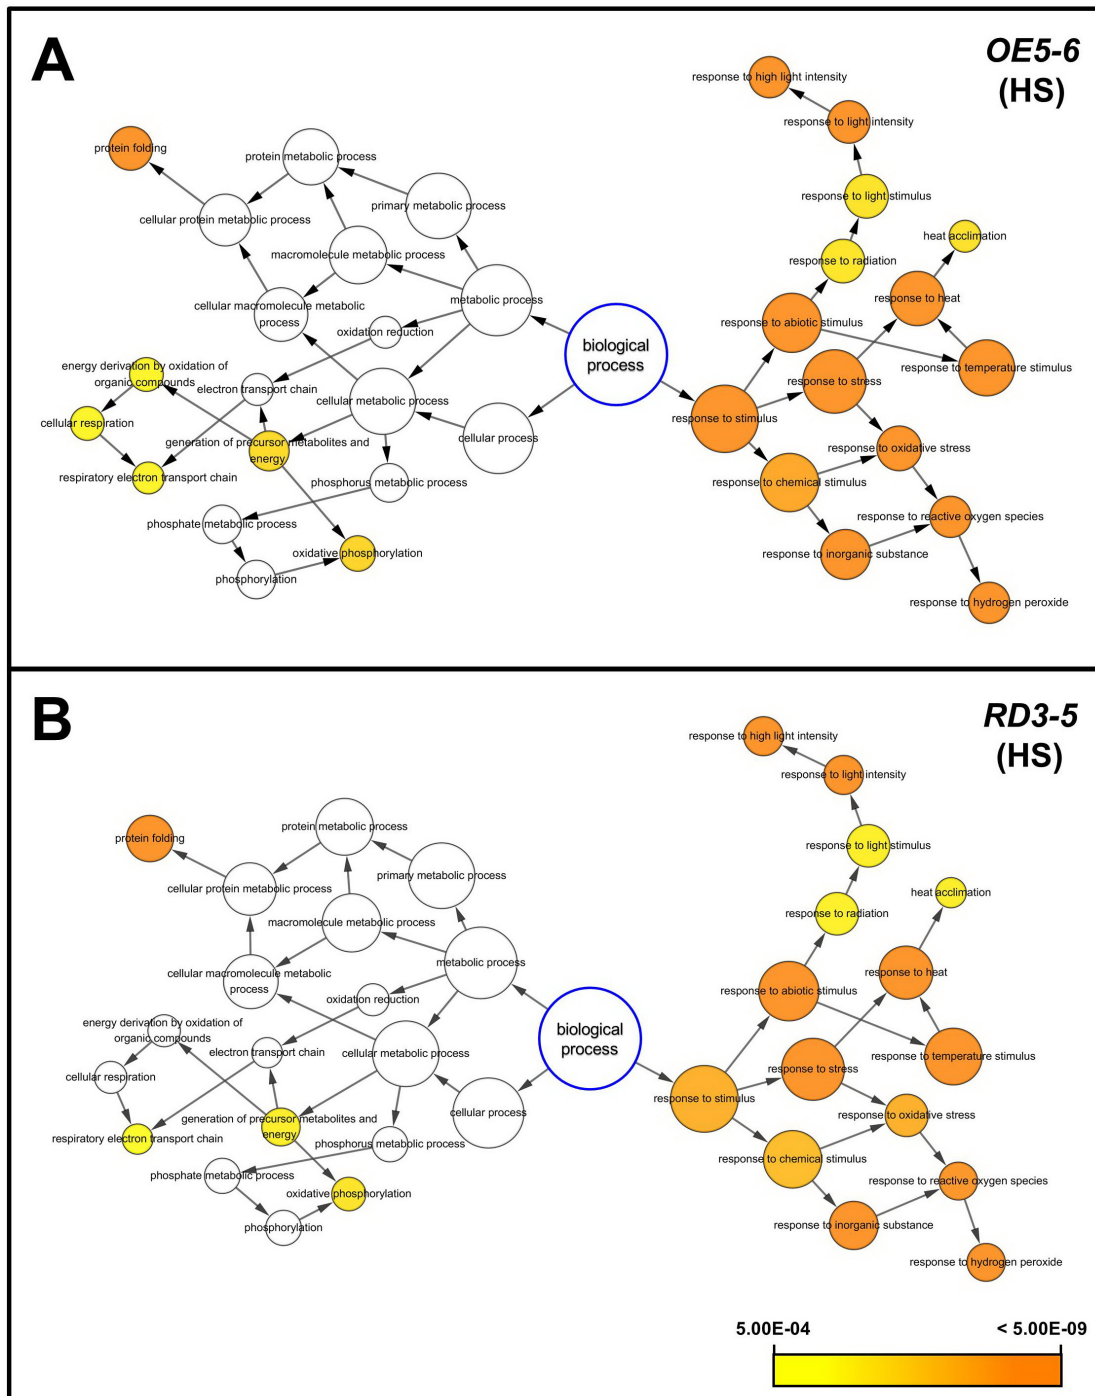

**Supplemental Figure S16. GO enrichment analysis of gene transcripts in response to HS treatment in *HSFA6b* mutants. (A and B) Network graphs of enriched GO terms in response to 37°C HS for 1 h in *OE5-6* and *RD3-5* mutants, respectively, as indicated in Supplemental Figures S14b and S15.**



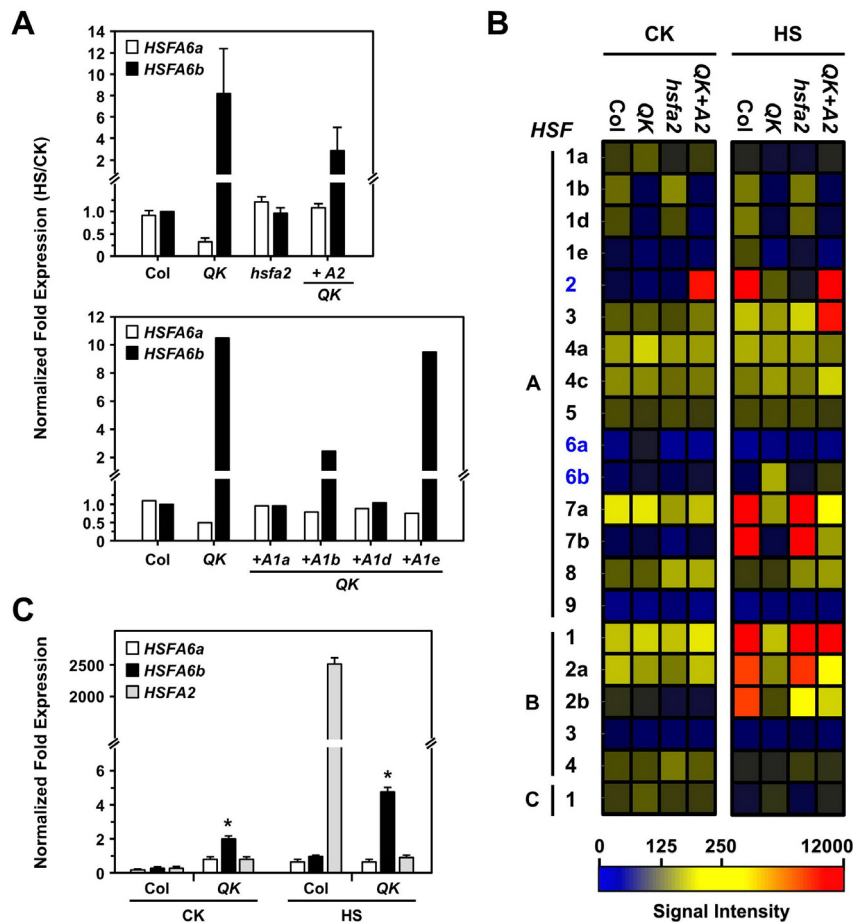

**Supplemental Figure S17.** The expression levels of *HSFA6a* and *HSFA6b* in response to HS treatment in *hsfa1a/b/d/e* quadruple-KO (*QK*) and *hsfa2* mutant lines. **(A)** Wild-type Col, *QK*, and *hsfa2*, as well as the *QK* plants complemented (+) with *HSFA2* and different member of the *HSFA1s*, are as indicated. The 1-h 37°C treatment served as HS and 22°C treatment was a control (CK). The fold expression (HS/CK) was normalized to that of the *HSFA6b* level in Col. Normalized and averaged signals were collected from the Gene Expression Omnibus (GEO; <http://www.ncbi.nlm.nih.gov/geo>) from the National Center for Biotechnology Information (NCBI) accession number GSE26266 and GSE44655 (Liu et al., 2011; 2013). **(B)** The heat maps show the expression level of *HSFA6a* and *HSFA6b*, in addition to that of the HSFs. **(C)** The expression levels of *HSFA6a*, *HSFA6b*, and *HSFA2* were analyzed by qRT-PCR, which was normalized to that of the *HSFA6b* level in Col HS treatment. Data are means  $\pm$  SD of 3 independent replicates. \*, Significant at  $P < 0.05$  (the *HSFA6b* level in *QK* compared with the Col).

**Supplemental Table S1. Primers used for genotyping, cloning, RT-PCR and real-time quantitative PCR, as well as accession numbers can be found in the TAIR database.**

| <b>Primer</b>     | <b>Sequence (5' to 3')</b> |
|-------------------|----------------------------|
| <b>Genotyping</b> |                            |
| HSFA6a_Fw         | GAACCAGAGACTTTTGCCCTAAT    |
| HSFA6a_Rv         | CTCCCCTTGTCTTGATGCTC       |
| HSFA6b-1_KO_Fw    | TTGTCCGCCAGCTCAACACA       |
| HSFA6b-1_KO_Rv    | ACTCCACCGATCCGGATTCACC     |
| HSFA6b-2_KO_Fw    | GGCAAAGCATCTCCTCAAG        |
| HSFA6b-2_KO_Rv    | CTTCCCAAAAACCTTCACCA       |
| <b>HSPs</b>       |                            |
| HSP17.4-CI_Fw     | AAATACGCCAACGCACATAA       |
| HSP17.4-CI_Rv     | AACTATCAATGGATCAAAACACTC   |
| HSP17.6A-CI_Fw    | AACTTCAATTCCTCGTCATCG      |
| HSP17.6A-CI_Rv    | ATCCAAATACACACATTTCTCCAC   |
| HSP17.6B-CI_Fw    | CTTGCCTGGATTGAAGAAGG       |
| HSP17.6B-CI_Rv    | AGGATCAAATGTATCCGATACATC   |
| HSP17.6C-CI_Fw    | GATTGGAGGGAGACACCTGA       |
| HSP17.6C-CI_Rv    | ACAAAGCACACTCTTATTAAGATT   |
| HSP17.8-CI_Fw     | AAACATCGGCGATAACGAAC       |
| HSP17.8-CI_Rv     | AATATAAAGGCCTTGCTTAATTAT   |
| HSP18.2-CI_Fw     | ACGTCTTTGATCCGTTCTCG       |

|                  |                          |
|------------------|--------------------------|
| HSP18.2-CI_Rv    | ATTCATAACACAACAAGCCAAG   |
| HSP17.6-CII_Fw   | GACCCGCAACAACCCTTCAC     |
| HSP17.6-CII_Rv   | ACCATATCCCTCACGCATTCC    |
| HSP26.5-MII_Fw   | TCACTCCCACCCTAAATGAG     |
| HSP26.5-MII_Rv   | TTCTCCGTCCTAGGAATCAC     |
| HSP70b_Fw (70-5) | AGACAATCAACCAGGCGTTCT    |
| HSP70b_Rv (70-5) | TCGCCTTCTCAATCTTCTGCT    |
| HSP90.1_Fw       | GCGAGGTCTGGAACAAAAGAG    |
| HSP90.1_Rv       | ATCGGTTTCTGCTTGTTGATG    |
| HSP101_Fw        | ACCGAGAAGAAGTCTCTGGC     |
| HSP101_Rv        | TTTCCCACGAAGCTTCTCAAC    |
| <b>HSFs</b>      |                          |
| HSFA1a_Fw        | CGAGGCCAATAAGAAGCGGAGACT |
| HSFA1a_Rv        | CTGAATCGGGACTGAACCACCATC |
| HSFA1b_Fw        | ACCGCCAGATTGTTAGATA      |
| HSFA1b_Rv        | CCGGGCAGCTTAGGGACTC      |
| HSFA1d_Fw        | CGGCGATGATGGTTTCCTTCTA   |
| HSFA1d_Rv        | TTGTCCCATCCATTTTGTTCCTG  |
| HSFA1e_Fw        | GTGGGTGCGTGCGTTGAAGT     |
| HSFA1e_Rv        | GAAGCCTGCAGGAATGGATGAAA  |
| HSFA2_Fw         | TGAGGCAACAGCAACACAGC     |
| HSFA2_Rv         | CAAAGGCGAACCAACCAAATCT   |
| HSFA3_Fw         | TGGAAAAGGCGAGAAAGAAGTT   |

|           |                          |
|-----------|--------------------------|
| HSFA3_Rv  | TTGGCGTATTATCATCATCAC    |
| HSFA4a_Fw | GCCAGGGCTTGCTTTGAAC      |
| HSFA4a_Rv | TCCGGCTTTATCTTTATCGTCTTT |
| HSFA4c_Fw | ACGGAATCAGAAAGACGGAGCAT  |
| HSFA4c_Rv | GAGCAGGCGCAGTAACGGTAAC   |
| HSFA5_Fw  | CACGCCTCCTTCTTCCAACCTACT |
| HSFA5_Rv  | CGCGTCTCGAGCTACCACTACTAT |
| HSFA7a_Fw | AGATGGGAATTTGCAAACGAA    |
| HSFA7a_Rv | TCCCAGAAACCATCATCCAACCT  |
| HSFA7b_Fw | TCCCCTCCTTCGCTTAACTACTCT |
| HSFA7b_Rv | ACCCGTCGTAAGCTCCCTCTC    |
| HSFA8_Fw  | CAGGAGGTGACGGATACTAAGA   |
| HSFA8_Rv  | GAAGGGCTCAACAACAAAAG     |
| HSFA9_Fw  | GAAGCGAGTACCACCACCACGACA |
| HSFA9_Rv  | TATCCTCCCATTACATCCATTGA  |
| HSFB1_Fw  | ACGGCGGGGAAATGTGTTGTTGT  |
| HSFB1_Rv  | CTTTTCATCCCGGTCCCTCTTTTT |
| HSFB2a_Fw | GTACCGGATCGATGGGAGTTTTTC |
| HSFB2a_Rv | ACCGCCGTCGTCTTCACCT      |
| HSFB2b_Fw | CGCCGGGAATAGTGGTGGAAGTAG |
| HSFB2b_Rv | CCGCAGGCGAAGAATTAGACGATA |
| HSFB3_Fw  | GTTCCGCCAGCTCAATACTTACG  |
| HSFB3_Rv  | AGCCCTTCATCTTCTTCATCATC  |

|                                          |                                       |
|------------------------------------------|---------------------------------------|
| HSFB4_Fw                                 | GAAATCCACCGCCGTAAAACATC               |
| HSFB4_Rv                                 | AGTGGCATTGACAGTGGCAGTATT              |
| HSFC1_Fw                                 | CGGACCGGTGGGAGTTTG                    |
| HSFC1_Rv                                 | ATGACGGCGACGGTGTGATGAT                |
| <b>Oxidative stress responsive genes</b> |                                       |
| APX1_Fw                                  | CAATGAGGTTTCCGGCTGAGCAAGC             |
| APX1_Rv                                  | CTGCAGTTAAGCATCAGCAAACCCAAGC          |
| APX2_Fw                                  | AGCCTTCAACGATTTCCAGAAG                |
| APX2_Rv                                  | TCGAATCCTGAACGCTCCTT                  |
| CAT1_Fw                                  | CAGTCTCACCTAAAAATCGC                  |
| CAT1_Rv                                  | ACTTGGGATTCGGTTTCAAT                  |
| CSD1_Fw                                  | TCTGAGCTCATGGCGAAAGGAGTTGCAGTTTTG     |
| CSD1_Rv                                  | TTAGCCCTGGAGACCAATGATGC               |
| CSD2_Fw                                  | TCTCCCGGGATGGCTGCCACCAACACAATCC       |
| CSD2_Rv                                  | TCTGGATCCGAGCGGCGTCAAGCCAATCA         |
| CSD3_Fw                                  | TCTGAGCTCATGGAAGCTCCTAGAGGAAATCTGAGAG |
| CSD3_Rv                                  | TCTCCCGGGTAGTTTAGCATCCGCAGATGATTGAAGT |
| <b>Cloning</b>                           |                                       |
| HSFA6b_cDNA_Fw                           | TCTGTGCGACTATGGATCCTTCATTTAGGTT       |
| HSFA6b_cDNA_Rv                           | TCTCTGCAGTTAATTAGTGTGTGAACTAG         |
| HA_Fw                                    | TCTCCCGGGATGTACCCATACGATGTTCCA        |
| HSFA6b_ORF_Rv                            | TCTCCCGGGATTAGTGTGTGAACTAGAA          |
| HSFA6b_ORF_Fw                            | ATGGATCCTTCATTTAGGTTTCATTA            |

|                                   |                                      |
|-----------------------------------|--------------------------------------|
| HSFA6b_ORF_Rv                     | ATTAGTGTGTGAACTAGAACCCAAA            |
| AREB1_Fw                          | AAGTCGACATGGATGGTAGTATGAATTTG        |
| AREB1_Rv                          | AAGGATCCTCACCAAGGTCCCG               |
| ProHSFA6b_1.0_Fw                  | CTCGAGGTTTTAAAAAATTGGATAACAACAC      |
| ProHSFA6b_1.0_Rv                  | CCATGGGGTTTTAAATTTAAACAAAGATTTTTTTAT |
| ProHSFA6b_1.7_Fw                  | CTCGAGTTCAATTTTCTCGTTATTGTTTTTAGG    |
| ProHSFA6b_1.7_Rv                  | CCATGGGGTTTTAAATTTAAACAAAGATTTTTTTAT |
| ProHSP18.1_1.0_Fw                 | GGATCCATTTGCAGTGTTATGAGTGAATTTT      |
| ProHSP18.1_1.0_Rv                 | CTC GAGTGTTTCGTTGCTTTTCGGGAGACTTTT   |
| ProDREB2A_1.0_Fw                  | CTCGAGTAAAATGGACGACACCCATCCAAT       |
| ProDREB2A_1.0_Rv                  | CCATGGAAGGAAGACAAAGTATCTACGGAGT      |
| ProAPX2_0.856_Fw                  | AAGGATCCTAATCTCGTCTGCTTTGG           |
| ProAPX2_0.856_Rv                  | AACCATGGTTTTTTCAAATTCGCTTCC          |
| <b>Real-time Quantitative PCR</b> |                                      |
| qHSFA2_Fw                         | CAGCGTTGGATGTGAAAGTG                 |
| qHSFA2_Rv                         | CAGCGTTGGATGTGAAAGTG                 |
| qHSFA6a_Fw                        | CAGCGTTGGATGTGAAAGTG                 |
| qHSFA6a_Rv                        | CAGCGTTGGATGTGAAAGTG                 |
| qHSFA6b_Fw                        | GTGATGAAAGTGGTTATGGGAATG             |
| qHSFA6b_Rv                        | TCCGACATCTCGAATTCAGACAT              |
| qRD22_Fw                          | ATTGTGCGACGTCTTTGGAGT                |
| qRD22_Rv                          | TGCGTTCTTCTTAGCCACCTC                |
| qRD29A_Fw                         | TGGATCTGAAGAACGAATCTGATATC           |

|                 |                                  |
|-----------------|----------------------------------|
| qRD29A_Rv       | GGTCTTCCCTTCGCCAGAA              |
| qRD29B_Fw       | AGTCGCCACGGTCCGTTGAAG            |
| qRD29B_Rv       | CCGCCACTGCCTCCCAACTC             |
| qNCED3_Fw       | AGCCGCCATTATCGTCTTCTC            |
| qNCED3_Rv       | GGAGTGTGAAGCGCAGATGAA            |
| qAAO3_Fw        | TCCATCATGGACTGCTCCTTC            |
| qAAO3_Rv        | CGAGACACTAGCGCCAAGAAA            |
| qDREB2A_Fw      | GACCTAAATGGCGACGATGT             |
| qDREB2A_Rv      | TCGAGCTGAAACGGAGGTAT             |
| qAREB1_Fw       | GAGAGAAGGCCAAAGGAGAATGA          |
| qAREB1_Rv       | CTTCAAGCTCCACGGTGTAAG            |
| qAPX2_Fw        | CGGGTTTGCTGACAAGGAGTA            |
| qAPX2_Rv        | GAGGGAACAAGAATCAAGGAGGTA         |
| qHSP18.1_Fw     | AAGGCAACAATGGAGAATGG             |
| qHSP18.1_Rv     | GCACACAAGCTTTTTATTTGACA          |
| <b>ChIP</b>     |                                  |
| qPCR_Fw         | ATTTTAAAAAGGTTTAAACT             |
| qPCR_Rv         | TCCGTTTCGACGAGTGTCTC             |
| 18S rDNA_Fw     | CCTGCGGCTTAATTTGACTC             |
| 18S rDNA_Rv     | GACAAATCGCTCCACCAACT             |
| <b>Controls</b> |                                  |
| UBQ10_Fw        | GATCTTTGCCGAAAACAATTGGAGGATGGT   |
| UBQ10_Rv        | CGACTTGTCATTAGAAAGAAAGAGATAACAGG |

|          |                                |
|----------|--------------------------------|
| ACT2_Fw  | ATGAAGCACAATCCAAGAGAGGTATTCTTA |
| ACT2_Rv  | GAGCTTCTCCTTGATGTCTTACAATTC    |
| qPP2A_Fw | CCTGCGGTAATAACTGCATCT          |
| qPP2A_Rv | CTTCACTTAGCTCCACCAAGCA         |

**Sequence data in this article can be found in the TAIR database under the following accession numbers:** AAO3 (At2g27150), APX1 (At1g07890), APX2 (At3g09640), AREB1/ABF2 (At1g45249), CAT1 (At1g20630), CSD1 (At1g08830), CSD2 (At2g28190), CSD3 (At5g18100), DREB2A (At5g05410), NCED3 (At3g14440), RD22 (At5g25610), RD29A (At5g52310), RD29B (At5g52300).

**HSP genes:** HSP17.4-CI (At3g46230), HSP17.6A-CI (At1g59860), HSP17.6B-CI (At2g29500), HSP17.6C-CI (At1g53540), HSP17.8-CI (At1g07400), HSP18.2-CI (At5g59720), HSP17.6-CII (At5g12020), HSP26.5-MII (At1g52560), HSP70b (At1g16030), HSP90.1 (At5g52640), HSP101 (At1g74310).

**HSF genes:** HSFA1a (At4g17750), HSFA1b (At5g16820), HSFA1d (At1g32330), HSFA1e (At3g02990), HSFA2 (At2g26150), HSFA3 (At5g03270), HSFA4a (At4g18880), HSFA4c (At5g45710), HSFA5 (At4g13980), HSFA7a (At3g51910), HSFA7b (At3g63350), HSFA8 (At1g67970), HSFA9 (At5g54070), HSFB1 (At4g36990), HSFB2a (At5g62020), HSFB2b (At4g11660), HSFB3 (At2g41690), HSFB4 (At1g46264), HSFC1 (At3g24520).













**Supplemental Table S3.** Enriched GO terms in differential expression genes (DEGs) expression changed more than 6 fold in transgenic plants harboring HSF6b-OE and HSF6b-RD under Salr or HS treatment. Enriched GO terms were identified using BINGO and GO\_full annotation (Maere et al., 2005). Significantly overrepresented terms with a  $p$ -value less than 5.00E-04 following a Benjamini and Hochberg false discovery rate correction are shown. BP, biological process. CC, cellular component. MF, molecular function.

**(A) Transgenic plants harboring HSF6b-OE in SALT condition**

| GO ID | GO Type | GO description                              | corrected p-value |
|-------|---------|---------------------------------------------|-------------------|
| 6950  | BP      | response to stress                          | 1.17E-19          |
| 42221 | BP      | response to chemical stimulus               | 1.88E-17          |
| 50896 | BP      | response to stimulus                        | 1.28E-16          |
| 9266  | BP      | response to temperature stimulus            | 2.57E-15          |
| 9408  | BP      | response to heat                            | 2.16E-14          |
| 9628  | BP      | response to abiotic stimulus                | 1.21E-13          |
| 9414  | BP      | response to water deprivation               | 5.69E-11          |
| 9415  | BP      | response to water                           | 8.48E-11          |
| 10033 | BP      | response to organic substance               | 7.78E-09          |
| 6979  | BP      | response to oxidative stress                | 1.96E-08          |
| 9644  | BP      | response to high light intensity            | 2.04E-08          |
| 9611  | BP      | response to wounding                        | 1.63E-07          |
| 6970  | BP      | response to osmotic stress                  | 2.44E-07          |
| 302   | BP      | response to reactive oxygen species         | 2.89E-07          |
| 42542 | BP      | response to hydrogen peroxide               | 5.58E-07          |
| 9642  | BP      | response to light intensity                 | 7.09E-07          |
| 9719  | BP      | response to endogenous substance            | 1.24E-06          |
| 10035 | BP      | response to inorganic substance             | 5.71E-06          |
| 10200 | BP      | response to chitin                          | 6.39E-06          |
| 9651  | BP      | response to salt stress                     | 6.43E-06          |
| 9743  | BP      | response to carbohydrate stimulus           | 1.63E-05          |
| 9416  | BP      | response to light stimulus                  | 5.76E-05          |
| 9753  | BP      | response to jasmonic acid stimulus          | 5.76E-05          |
| 9314  | BP      | response to radiation                       | 7.40E-05          |
| 71495 | BP      | cellular response to endogenous stimulus    | 2.01E-04          |
| 9737  | BP      | response to abscisic acid stimulus          | 3.17E-04          |
| 9867  | BP      | jasmonic acid mediated signaling pathway    | 3.76E-04          |
| 71395 | BP      | cellular response to jasmonic acid stimulus | 3.76E-04          |
| 16563 | MF      | transcription activator activity            | 3.87E-04          |

**(B) Transgenic plants harboring HSF6b-RD in SALT condition**

| GO ID | GO Type | GO description                     | corrected p-value |
|-------|---------|------------------------------------|-------------------|
| 9414  | BP      | response to water deprivation      | 3.69E-18          |
| 6950  | BP      | response to stress                 | 3.69E-18          |
| 9415  | BP      | response to water                  | 3.69E-18          |
| 9266  | BP      | response to temperature stimulus   | 1.31E-16          |
| 42221 | BP      | response to chemical stimulus      | 2.01E-16          |
| 50896 | BP      | response to stimulus               | 7.49E-14          |
| 10033 | BP      | response to organic substance      | 1.34E-13          |
| 9628  | BP      | response to abiotic stimulus       | 1.78E-13          |
| 9409  | BP      | response to cold                   | 3.99E-13          |
| 9737  | BP      | response to abscisic acid stimulus | 3.61E-12          |
| 9719  | BP      | response to endogenous substance   | 2.03E-10          |
| 6970  | BP      | response to osmotic stress         | 1.60E-08          |
| 9725  | BP      | response to hormone stimulus       | 1.98E-08          |
| 10200 | BP      | response to chitin                 | 3.46E-08          |
| 9408  | BP      | response to heat                   | 3.84E-07          |
| 9611  | BP      | response to wounding               | 4.22E-07          |
| 9743  | BP      | response to carbohydrate stimulus  | 7.74E-07          |
| 9269  | BP      | response to desiccation            | 1.07E-05          |
| 9631  | BP      | cold acclimation                   | 2.37E-05          |
| 9651  | BP      | response to salt stress            | 4.12E-05          |

**(C) Transgenic plants harboring HSF6b-OE in HS condition**

| GO ID | GO Type | GO description                                 | corrected p-value |
|-------|---------|------------------------------------------------|-------------------|
| 9408  | BP      | response to heat                               | 1.99E-28          |
| 9266  | BP      | response to temperature stimulus               | 8.84E-24          |
| 6457  | BP      | protein folding                                | 1.18E-13          |
| 9628  | BP      | response to abiotic stimulus                   | 4.64E-13          |
| 9644  | BP      | response to high light intensity               | 5.85E-12          |
| 42542 | BP      | response to hydrogen peroxide                  | 1.67E-10          |
| 6950  | BP      | response to stress                             | 2.74E-10          |
| 10035 | BP      | response to inorganic substance                | 5.93E-10          |
| 9642  | BP      | response to light intensity                    | 1.05E-09          |
| 302   | BP      | response to reactive oxygen species            | 7.05E-09          |
| 50896 | BP      | response to stimulus                           | 1.04E-07          |
| 6979  | BP      | response to oxidative stress                   | 1.05E-07          |
| 42221 | BP      | response to chemical stimulus                  | 4.17E-07          |
| 6119  | BP      | oxidative phosphorylation                      | 3.06E-05          |
| 10286 | BP      | heat acclimation                               | 7.82E-05          |
| 9416  | BP      | response to light stimulus                     | 8.80E-05          |
| 6091  | BP      | generation of precursor metabolites and energy | 8.80E-05          |
| 9314  | BP      | response to radiation                          | 1.09E-04          |
| 22904 | BP      | respiratory electron transport chain           | 3.55E-04          |
| 5618  | CC      | cell wall                                      | 8.93E-05          |
| 30312 | CC      | external encapsulating structure               | 9.30E-05          |
| 30554 | MF      | adenyl nucleotide binding                      | 1.24E-04          |
| 1883  | MF      | purine nucleotide binding                      | 1.24E-04          |
| 1882  | MF      | nucleotide binding                             | 1.25E-04          |
| 5524  | MF      | ATP binding                                    | 1.52E-04          |
| 32559 | MF      | adenyl ribonucleotide binding                  | 1.52E-04          |

**(D) Transgenic plants harboring HSF6b-RD in HS condition**

| GO ID | GO Type | GO description                                      | corrected p-value |
|-------|---------|-----------------------------------------------------|-------------------|
| 9408  | BP      | response to heat                                    | 5.29E-28          |
| 9266  | BP      | response to temperature stimulus                    | 1.28E-20          |
| 42542 | BP      | response to hydrogen peroxide                       | 3.32E-13          |
| 9644  | BP      | response to high light intensity                    | 4.23E-13          |
| 9628  | BP      | response to abiotic stimulus                        | 1.76E-12          |
| 9642  | BP      | response to light intensity                         | 2.20E-12          |
| 6950  | BP      | response to stress                                  | 4.67E-12          |
| 302   | BP      | response to reactive oxygen species                 | 1.55E-11          |
| 10035 | BP      | response to inorganic substance                     | 4.10E-11          |
| 6457  | BP      | protein folding                                     | 1.83E-09          |
| 6979  | BP      | response to oxidative stress                        | 3.56E-09          |
| 50896 | BP      | response to stimulus                                | 3.59E-09          |
| 42221 | BP      | response to chemical stimulus                       | 3.83E-08          |
| 6119  | BP      | oxidative phosphorylation                           | 5.60E-06          |
| 6091  | BP      | generation of precursor metabolites and energy      | 9.30E-06          |
| 10286 | BP      | heat acclimation                                    | 2.24E-05          |
| 9416  | BP      | response to light stimulus                          | 2.63E-05          |
| 9314  | BP      | response to radiation                               | 3.56E-05          |
| 22904 | BP      | respiratory electron transport chain                | 1.50E-04          |
| 15980 | BP      | energy derivation by oxidation of organic compounds | 1.71E-04          |
| 45333 | BP      | cellular respiration                                | 1.71E-04          |

**Supplementary TableS4.** The top 39 DEGs with levels changed > 30-fold at  $p < 0.05$  in HSF6b mutants OE5-6 and RD3-5 after 150 mM NaCl for 6 h or 37°C HS for 1 h treatment as compared with the Col control (CK) treatment.

| Treatment line<br>Locus Identifier | CK<br>WT   |         | CK<br>ATHSFA6b-OE |         | CK<br>ATHSFA6b-RD |         | SALT<br>WT |         | SALT<br>ATHSFA6b-OE |         | SALT<br>ATHSFA6b-RD |         | HS<br>WT   |         | HS<br>ATHSFA6b-OE |         | HS<br>ATHSFA6b-RD |         | Symbol    | Array Element | Gene Function                                                     |
|------------------------------------|------------|---------|-------------------|---------|-------------------|---------|------------|---------|---------------------|---------|---------------------|---------|------------|---------|-------------------|---------|-------------------|---------|-----------|---------------|-------------------------------------------------------------------|
|                                    | Normalized | p-value | Normalized        | p-value | Normalized        | p-value | Normalized | p-value | Normalized          | p-value | Normalized          | p-value | Normalized | p-value | Normalized        | p-value | Normalized        | p-value |           |               |                                                                   |
| AT2G19310                          | 0.99       | 0.95    | 1.98              | 0.13    | 0.83              | 0.30    | 9.58       | 0.08    | 9.98                | 0.05    | 4.16                | 0.06    | 56.67      | 0.00    | 44.68             | 0.01    | 41.74             | 0.02    | HSP18.5   | 267336_at     | HSP20-like chaperones superfamily protein                         |
| AT5G25450                          | 1.00       | 0.97    | 1.83              | 0.03    | 1.09              | 0.41    | 12.33      | 0.07    | 12.46               | 0.02    | 5.45                | 0.05    | 98.55      | 0.00    | 74.69             | 0.01    | 78.50             | 0.03    |           | 246944_at     | Cytochrome bd ubiquinol oxidase, 14kDa subunit                    |
| AT2G29500                          | 0.92       | 0.87    | 2.25              | 0.23    | 0.58              | 0.47    | 15.64      | 0.00    | 19.44               | 0.00    | 3.34                | 0.20    | 134.48     | 0.00    | 120.65            | 0.00    | 104.98            | 0.03    | HSP17.6B  | 266294_at     | HSP20-like chaperones superfamily protein                         |
| AT2G47180                          | 0.99       | 0.95    | 1.32              | 0.30    | 0.54              | 0.18    | 5.21       | 0.18    | 6.87                | 0.00    | 1.82                | 0.17    | 34.01      | 0.00    | 29.85             | 0.00    | 26.19             | 0.04    | GOLS1     | 263320_at     | Galactinol synthase 1                                             |
| AT4G36990                          | 0.97       | 0.92    | 1.60              | 0.20    | 0.52              | 0.14    | 5.36       | 0.06    | 8.94                | 0.06    | 3.44                | 0.00    | 77.52      | 0.01    | 74.90             | 0.01    | 57.55             | 0.01    | HSFB1     | 246214_at     | Heat shock transcription factor B1                                |
| AT5G58770                          | 1.00       | 0.97    | 1.66              | 0.18    | 0.90              | 0.55    | 6.14       | 0.21    | 7.19                | 0.14    | 4.45                | 0.15    | 24.64      | 0.08    | 31.03             | 0.04    | 16.55             | 0.01    |           | 247780_at     | Undecaprenyl pyrophosphate synthetase family protein              |
| AT2G32120                          | 0.99       | 0.97    | 0.99              | 0.95    | 0.87              | 0.17    | 12.06      | 0.11    | 10.86               | 0.03    | 2.93                | 0.14    | 126.82     | 0.01    | 104.49            | 0.01    | 96.54             | 0.03    | HSP70T-2  | 265675_at     | Heat-shock protein 70T-2                                          |
| AT5G10695                          | 0.95       | 0.90    | 1.10              | 0.76    | 0.84              | 0.80    | 9.07       | 0.04    | 7.60                | 0.02    | 3.31                | 0.06    | 113.47     | 0.01    | 83.39             | 0.01    | 82.34             | 0.03    |           | 246018_at     | Unknown protein                                                   |
| AT3G25230                          | 0.98       | 0.94    | 0.88              | 0.06    | 0.92              | 0.74    | 4.48       | 0.12    | 4.76                | 0.12    | 2.72                | 0.02    | 34.39      | 0.02    | 33.16             | 0.01    | 31.95             | 0.03    | ROF1      | 257822_at     | Rotamase FKBP 1                                                   |
| AT3G51910                          | 0.99       | 0.96    | 0.91              | 0.24    | 1.06              | 0.70    | 4.60       | 0.01    | 4.32                | 0.02    | 2.65                | 0.04    | 34.01      | 0.01    | 25.64             | 0.02    | 30.31             | 0.03    | HSFA7A    | 252081_at     | Heat shock transcription factor A7A                               |
| AT1G16030                          | 1.00       | 0.99    | 1.16              | 0.22    | 0.98              | 0.74    | 26.67      | 0.03    | 34.48               | 0.03    | 6.63                | 0.18    | 340.51     | 0.00    | 301.70            | 0.01    | 286.78            | 0.02    | HSP70b    | 261838_at     | Heat shock protein 70B                                            |
| AT1G26800                          | 1.00       | 1.00    | 0.95              | 0.17    | 1.23              | 0.36    | 10.17      | 0.03    | 10.86               | 0.02    | 3.92                | 0.04    | 48.05      | 0.00    | 40.84             | 0.01    | 35.43             | 0.02    |           | 261265_at     | RING/U-box superfamily protein                                    |
| AT1G30070                          | 1.00       | 0.98    | 0.96              | 0.51    | 1.06              | 0.61    | 15.65      | 0.10    | 12.33               | 0.08    | 5.80                | 0.00    | 142.27     | 0.01    | 113.05            | 0.00    | 130.83            | 0.01    |           | 260025_at     | SGS domain-containing protein                                     |
| AT5G35320                          | 0.99       | 0.95    | 1.03              | 0.85    | 1.08              | 0.32    | 13.94      | 0.05    | 12.89               | 0.04    | 6.27                | 0.03    | 92.65      | 0.02    | 80.82             | 0.01    | 85.69             | 0.03    |           | 246612_at     | Unknown protein                                                   |
| AT3G16050                          | 0.99       | 0.95    | 0.86              | 0.58    | 1.26              | 0.65    | 14.86      | 0.06    | 15.43               | 0.00    | 6.92                | 0.05    | 162.86     | 0.00    | 149.22            | 0.00    | 147.97            | 0.03    | PDX1.2    | 258336_at     | Pyridoxine biosynthesis 1.2                                       |
| AT3G12050                          | 0.98       | 0.94    | 1.01              | 0.84    | 1.02              | 0.80    | 5.43       | 0.07    | 5.97                | 0.02    | 3.25                | 0.01    | 35.77      | 0.00    | 30.38             | 0.01    | 28.28             | 0.02    |           | 256663_at     | aha1 domain-containing protein                                    |
| AT5G09590                          | 0.99       | 0.95    | 0.97              | 0.01    | 0.81              | 0.22    | 7.69       | 0.00    | 9.04                | 0.01    | 4.75                | 0.04    | 80.59      | 0.01    | 71.41             | 0.00    | 68.11             | 0.02    | MTHSC70-2 | 250502_at     | Mitochondrial HSO70 2                                             |
| AT1G07350                          | 0.99       | 0.95    | 0.95              | 0.81    | 1.02              | 0.43    | 12.86      | 0.08    | 12.75               | 0.03    | 8.63                | 0.00    | 48.95      | 0.02    | 43.22             | 0.00    | 37.32             | 0.02    | SR45a     | 261081_at     | RNA-binding (RRM/RBD/RNP motifs) family protein                   |
| AT3G09440                          | 1.00       | 0.98    | 1.06              | 0.59    | 0.94              | 0.44    | 15.75      | 0.03    | 12.69               | 0.09    | 9.01                | 0.08    | 56.78      | 0.02    | 49.70             | 0.02    | 47.36             | 0.02    |           | 258979_at     | Heat shock protein 70 (Hsp 70) family protein                     |
| AT4G12400                          | 1.00       | 0.98    | 1.19              | 0.41    | 0.99              | 0.98    | 32.71      | 0.06    | 30.27               | 0.05    | 13.00               | 0.05    | 171.53     | 0.00    | 152.08            | 0.00    | 145.27            | 0.01    | HOP3      | 254839_at     | Stress-inducible protein, putative                                |
| AT3G07090                          | 1.00       | 0.97    | 0.99              | 0.83    | 0.74              | 0.40    | 9.43       | 0.08    | 9.97                | 0.07    | 5.61                | 0.04    | 45.97      | 0.00    | 37.63             | 0.01    | 41.28             | 0.03    |           | 258830_at     | PPPDE putative thiol peptidase family protein                     |
| AT4G23570                          | 0.95       | 0.90    | 0.94              | 0.69    | 1.23              | 0.46    | 7.65       | 0.13    | 7.42                | 0.11    | 6.26                | 0.14    | 43.25      | 0.05    | 30.51             | 0.00    | 37.74             | 0.02    | SGT1A     | 254211_at     | Phosphatase-related                                               |
| AT1G54050                          | 1.00       | 1.00    | 0.98              | 0.78    | 1.32              | 0.31    | 71.51      | 0.00    | 71.52               | 0.00    | 36.53               | 0.03    | 195.21     | 0.00    | 156.21            | 0.00    | 151.22            | 0.02    | HSP17.4   | 263150_at     | HSP20-like chaperones superfamily protein                         |
| AT3G09350                          | 0.99       | 0.95    | 1.17              | 0.57    | 1.42              | 0.25    | 108.66     | 0.02    | 93.26               | 0.02    | 76.75               | 0.00    | 187.54     | 0.01    | 155.87            | 0.00    | 165.78            | 0.02    | Fes1A     | 259037_at     | Fes1A                                                             |
| AT3G24500                          | 0.97       | 0.92    | 1.39              | 0.65    | 0.62              | 0.16    | 86.33      | 0.04    | 85.07               | 0.01    | 35.92               | 0.01    | 240.40     | 0.01    | 190.96            | 0.00    | 184.66            | 0.03    | MBF1C     | 258133_at     | Multiprotein bridging factor 1C                                   |
| AT5G52640                          | 1.00       | 0.99    | 1.13              | 0.49    | 0.69              | 0.03    | 49.50      | 0.01    | 51.41               | 0.00    | 24.06               | 0.05    | 176.39     | 0.00    | 149.88            | 0.01    | 134.73            | 0.03    | HSP90.1   | 248332_at     | Heat shock protein 90.1                                           |
| AT3G12580                          | 0.97       | 0.93    | 1.49              | 0.00    | 0.41              | 0.18    | 34.48      | 0.04    | 42.84               | 0.01    | 19.39               | 0.03    | 83.76      | 0.01    | 75.19             | 0.01    | 68.70             | 0.03    | HSP70     | 256245_at     | Heat shock protein 70                                             |
| AT5G48570                          | 1.00       | 0.99    | 1.33              | 0.06    | 0.53              | 0.21    | 45.26      | 0.03    | 46.35               | 0.01    | 11.95               | 0.00    | 143.37     | 0.00    | 128.58            | 0.01    | 117.63            | 0.02    | ROF2      | 248657_at     | FKBP-type peptidyl-prolyl cis-trans isomerase family protein      |
| AT5G05410                          | 0.99       | 0.96    | 1.30              | 0.01    | 0.64              | 0.07    | 85.07      | 0.02    | 95.38               | 0.00    | 56.15               | 0.02    | 66.95      | 0.02    | 35.83             | 0.00    | 37.61             | 0.05    | DREB2A    | 250781_at     | DRE-binding protein 2A                                            |
| AT1G67360                          | 0.99       | 0.95    | 1.56              | 0.27    | 0.54              | 0.03    | 4.29       | 0.28    | 11.14               | 0.12    | 0.42                | 0.09    | 75.03      | 0.01    | 68.90             | 0.00    | 49.41             | 0.02    |           | 264968_at     | Rubber elongation factor protein (REF)                            |
| AT5G12110                          | 1.00       | 0.99    | 1.85              | 0.00    | 0.51              | 0.06    | 4.12       | 0.05    | 6.52                | 0.06    | 0.60                | 0.47    | 38.62      | 0.02    | 35.94             | 0.00    | 26.57             | 0.02    |           | 250304_at     | Glutathione S-transferase                                         |
| AT1G17870                          | 1.00       | 0.99    | 1.91              | 0.16    | 0.50              | 0.08    | 4.96       | 0.19    | 7.21                | 0.05    | 1.11                | 0.61    | 32.09      | 0.06    | 34.92             | 0.01    | 34.07             | 0.02    | EGY3      | 255891_at     | Ethylene-dependent gravitropism-deficient and yellow-green-like 3 |
| AT1G03070                          | 0.96       | 0.91    | 1.12              | 0.58    | 1.09              | 0.73    | 3.70       | 0.25    | 6.19                | 0.10    | 0.85                | 0.77    | 168.09     | 0.03    | 180.81            | 0.02    | 119.03            | 0.01    |           | 263164_at     | Bax inhibitor-1 family protein                                    |
| AT4G26270                          | 1.00       | 0.99    | 0.94              | 0.77    | 0.74              | 0.32    | 1.45       | 0.14    | 1.66                | 0.18    | 0.91                | 0.64    | 34.58      | 0.02    | 30.64             | 0.03    | 21.60             | 0.05    | PFK3      | 253987_at     | Phosphofructokinase 3                                             |
| AT5G47610                          | 0.98       | 0.93    | 1.29              | 0.36    | 0.41              | 0.20    | 1.44       | 0.61    | 2.19                | 0.37    | 0.29                | 0.10    | 28.57      | 0.06    | 30.47             | 0.01    | 22.71             | 0.03    |           | 248759_at     | RING/U-box superfamily protein                                    |
| AT5G59720                          | 1.00       | 0.97    | 7.05              | 0.02    | 0.72              | 0.22    | 4.64       | 0.00    | 6.94                | 0.08    | 1.20                | 0.42    | 259.01     | 0.00    | 225.01            | 0.00    | 195.59            | 0.02    | HSP18.1   | 247691_at     | Heat shock protein 18.2                                           |
| AT4G25340                          | 0.97       | 0.92    | 1.14              | 0.47    | 0.87              | 0.79    | 0.76       | 0.58    | 0.86                | 0.70    | 0.50                | 0.24    | 32.27      | 0.01    | 30.23             | 0.00    | 20.23             | 0.00    | FKBP53    | 254076_at     | FK506 BINDING PROTEIN 53                                          |
| AT5G43170                          | 0.99       | 0.97    | 1.41              | 0.16    | 0.88              | 0.50    | 2.34       | 0.04    | 3.06                | 0.03    | 2.20                | 0.04    | 47.00      | 0.00    | 50.63             | 0.01    | 9.32              | 0.04    | ZF3       | 249139_at     | Zinc-finger protein 3                                             |
